# Supplementary material for: Francisella tularensis IglG Belongs to a Novel Family of PAAR-Like T6SS Proteins and Harbors a Unique N-terminal Extension Required for Virulence
Source: PubMed Central journal article supplement (PMC5014421; doi:10.1371/journal.ppat.1005821), 2016-09-07
Supplement: ppat.1005821.s014.pdf [file ppat.1005821.s014.pdf]

A

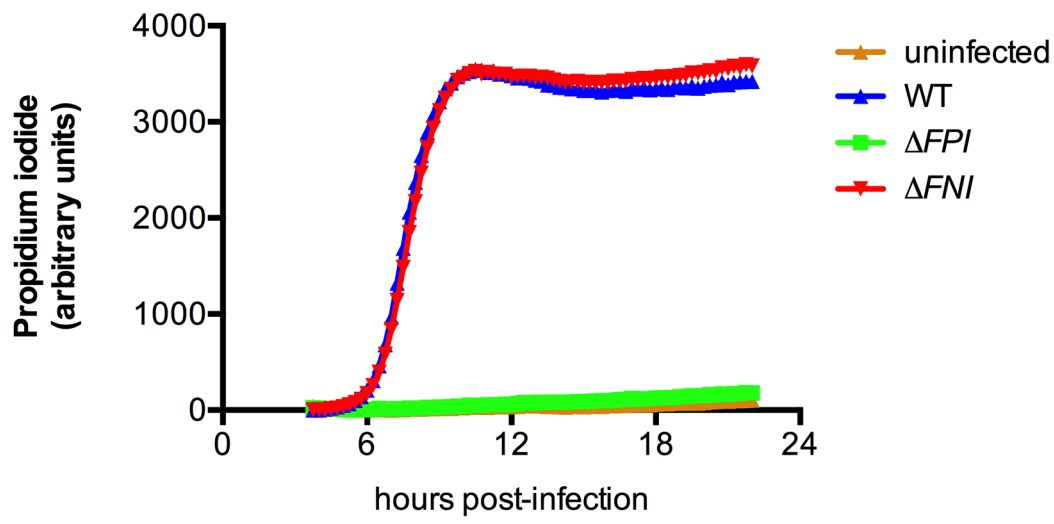

B

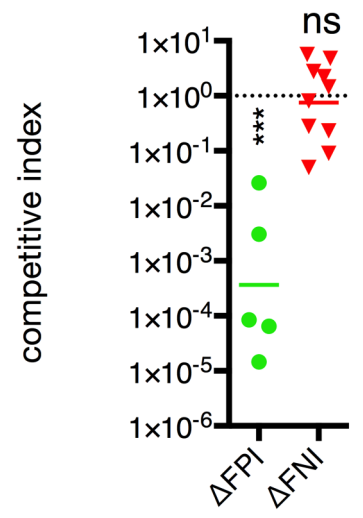

Figure S14
